# Supplementary material
Source: publisher figshare collection journal article supplement (https://asha.figshare.com/articles/dataset/_/26999326)
Supplement: Supplementary file 1 [file 1]

**Supplemental Material S1.** Script trained example: My story.

1. Do you experience any difficulties? I have many difficulties in communicating.  
Sometimes, I have trouble finding words and articulating them well.
2. What was your job? Previously, I worked as an elevator assembler and set up a company.  
I coordinated my work in general.
3. What do you like to do now? Now, I like to go biking with a friend and plant vegetables  
in the garden.
