# Supplementary material
Source: publisher figshare collection journal article supplement (https://asha.figshare.com/articles/dataset/_/26999326)
Supplement: Supplementary file 2 [file 1]

Supplemental material, Montagut et al., "Effects of Modified Video-Implemented Script Training for Aphasia in the Three Variants of Primary Progressive Aphasia," *JSLHR*, [https://doi.org/10.1044/2024\\_JSLHR-23-00583](https://doi.org/10.1044/2024_JSLHR-23-00583)

# Perceived Satisfaction/Acceptability Questionnaire

Satisfaction/Acceptability Questionnaire related to script intervention

Please, chose only one answer for each question

## 1. The therapy helped me emotionally

Marqueu només un oval.

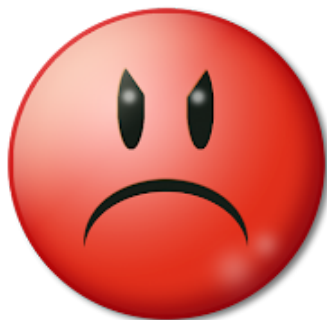

☐ Strongly disagree

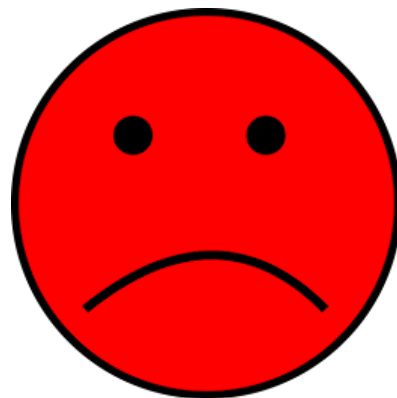

☐ Disagree

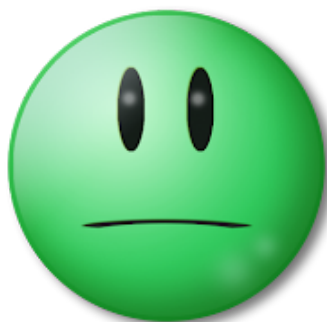

☐ Neither agree nor disagree

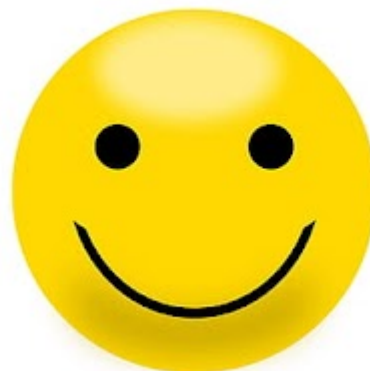

☐ Agree

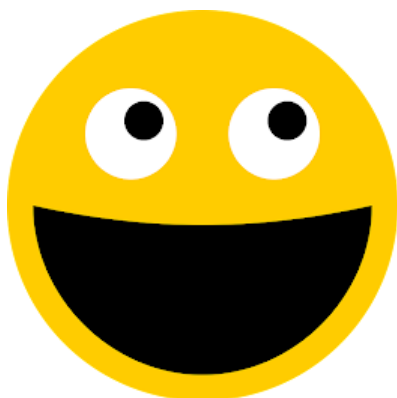

☐ Strongly agree

## 2. The therapy benefitted my communication on a day-to-day basis

*Marqueu només un oval.*

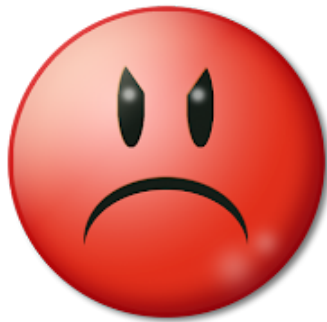

☐ Strongly disagree

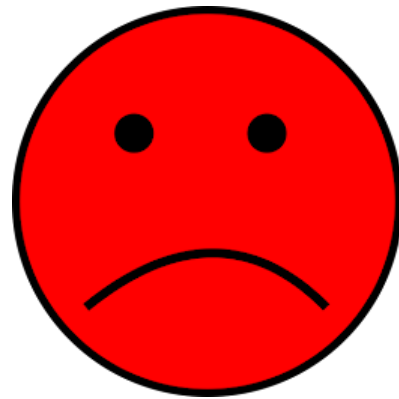

☐ Disagree

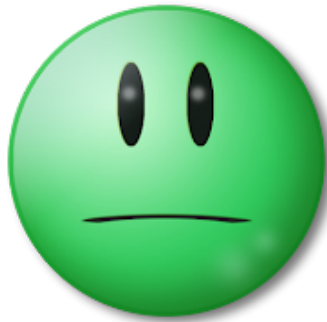

☐ Neither agree nor disagree

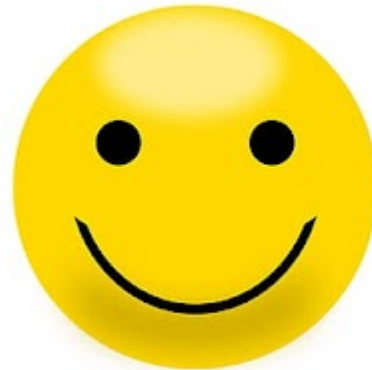

☐ Agree

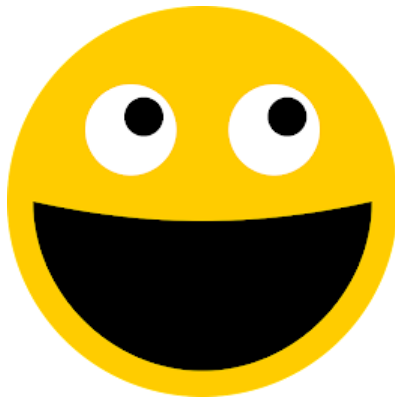

☐ Strongly agree

3. Independent home practice has been beneficial as a complement to therapy

*Marqueu només un oval.*

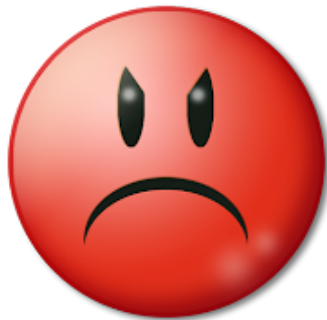

☐ Strongly disagree



☐ Disagree

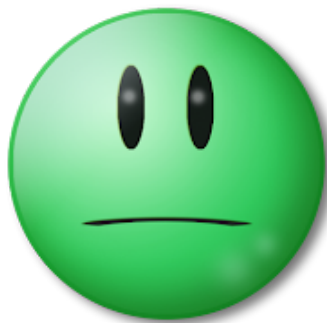

☐ Neither agree nor disagree

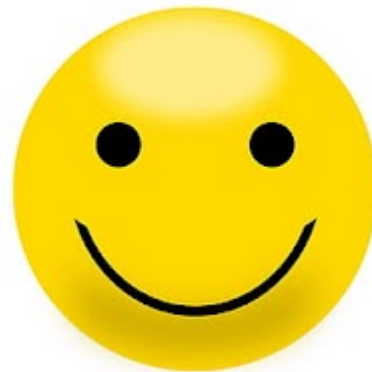

☐ Agree

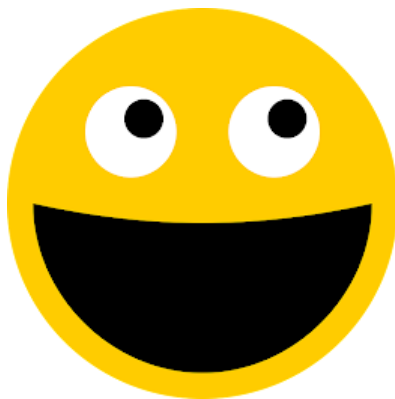

☐ Strongly agree

## 4. I want to continue with speech-language therapy

Marqueu només un oval.



☐ Strongly disagree



☐ Disagree



☐ Neither agree nor disagree



☐ Agree



☐ Strongly agree

## 5. General satisfaction with the therapy

*Marqueu només un oval.*

|                       |                       |                       |                       |                       |                       |                       |                       |                       |                       |                       |
|-----------------------|-----------------------|-----------------------|-----------------------|-----------------------|-----------------------|-----------------------|-----------------------|-----------------------|-----------------------|-----------------------|
| 0                     | 1                     | 2                     | 3                     | 4                     | 5                     | 6                     | 7                     | 8                     | 9                     | 10                    |
| <input type="radio"/> |

---

Google no ha creat ni aprovat aquest contingut.

Google Formularis
